# Supplementary material for: Effects of NRAS Mutations on Leukemogenesis and Targeting of Children With Acute Lymphoblastic Leukemia
Source: PubMed Central journal article supplement (PMC8861515; doi:10.3389/fcell.2022.712484), 2022-02-08

# Supplementary Figure 1

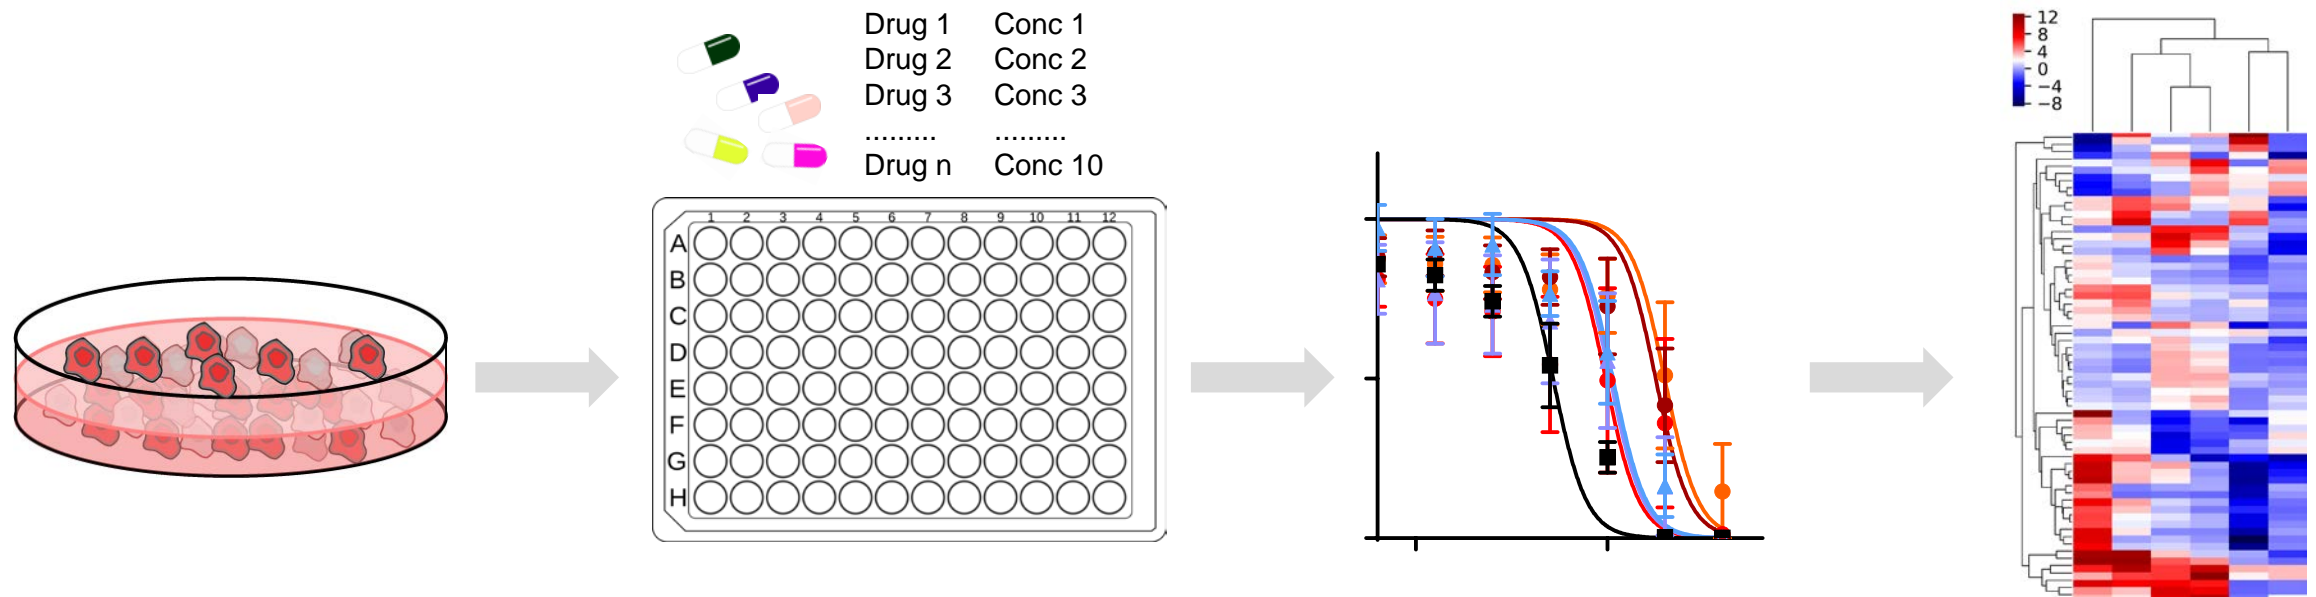

# Supplementary Figure 2

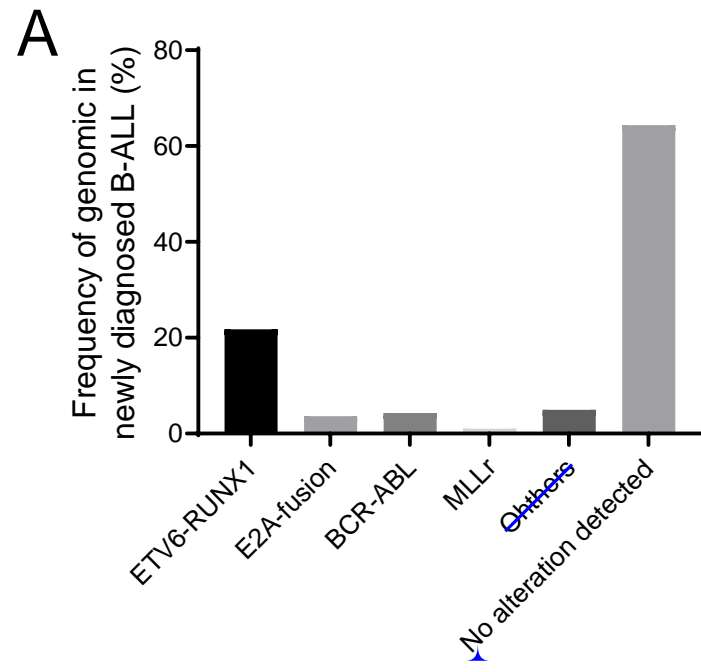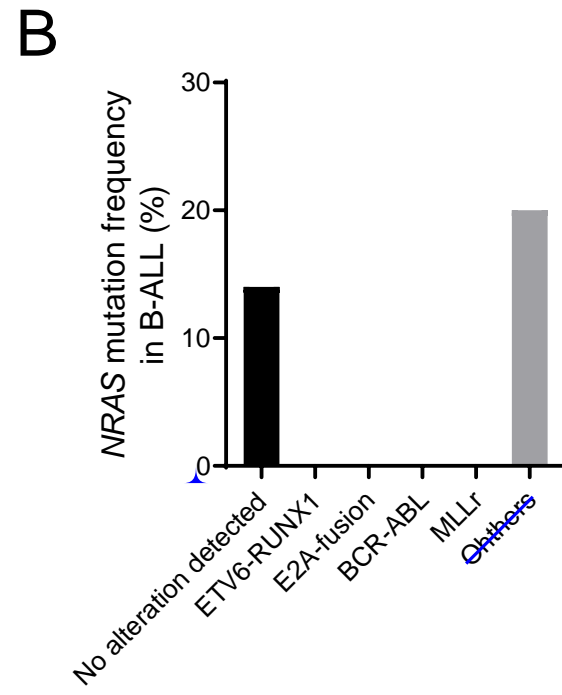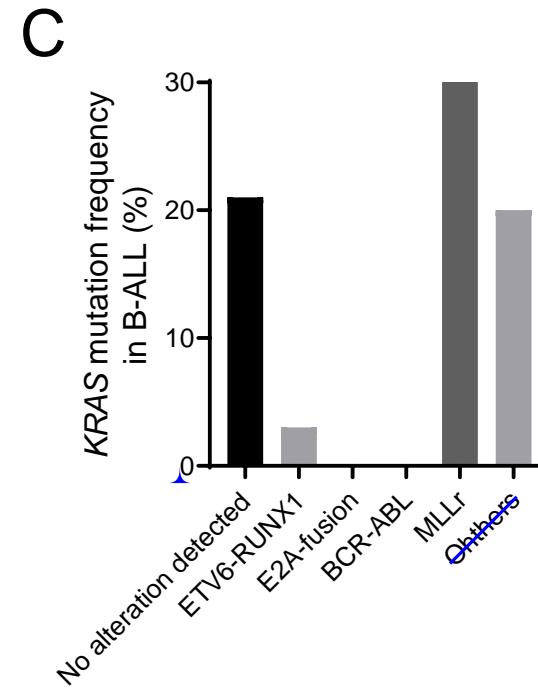

# Supplementary Figure 3

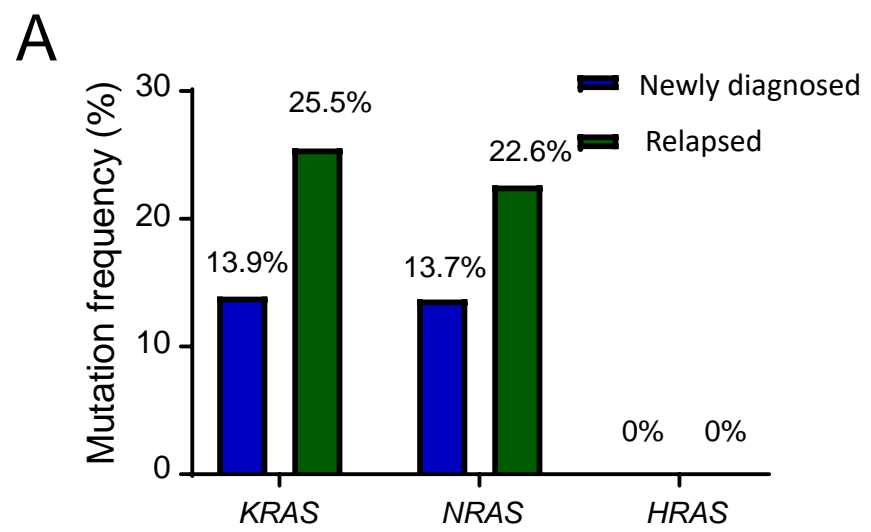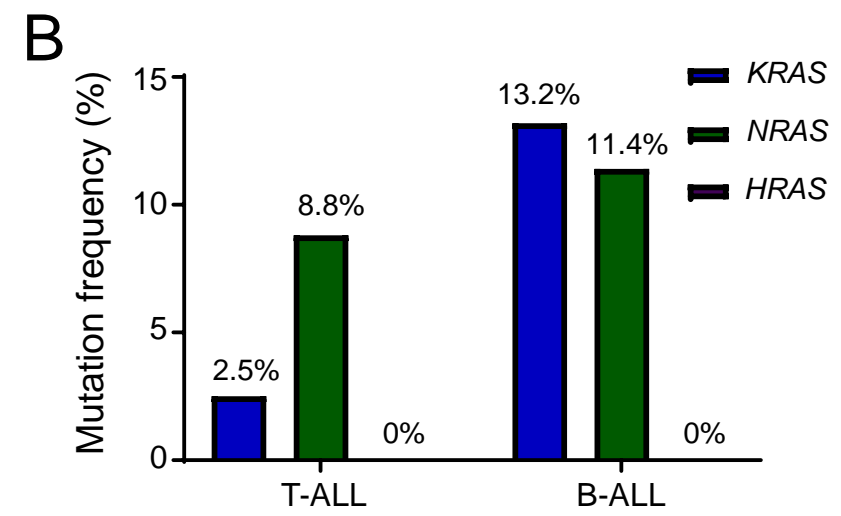

# Supplementary Figure 4

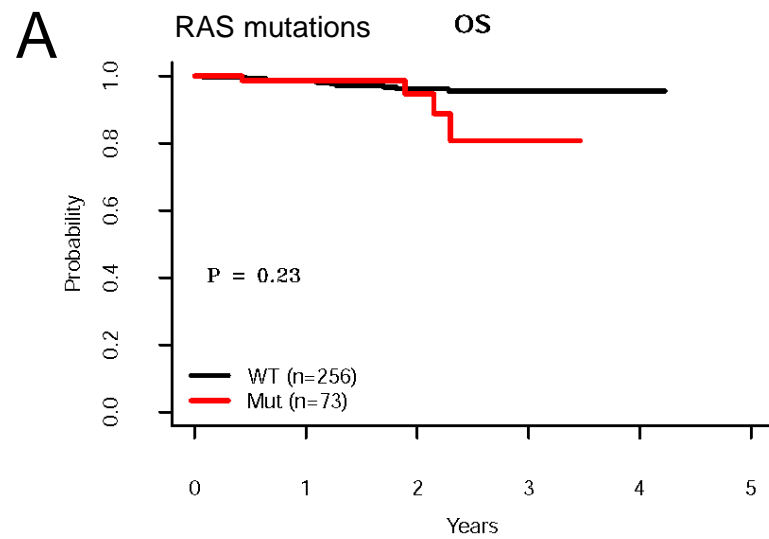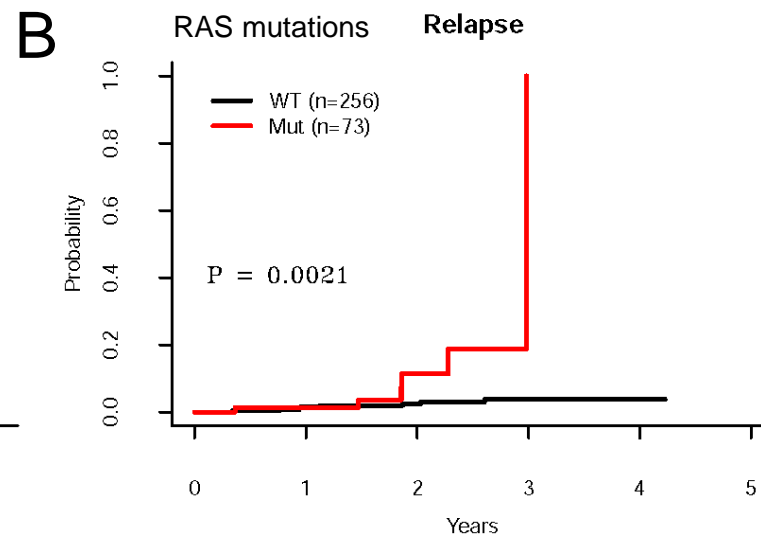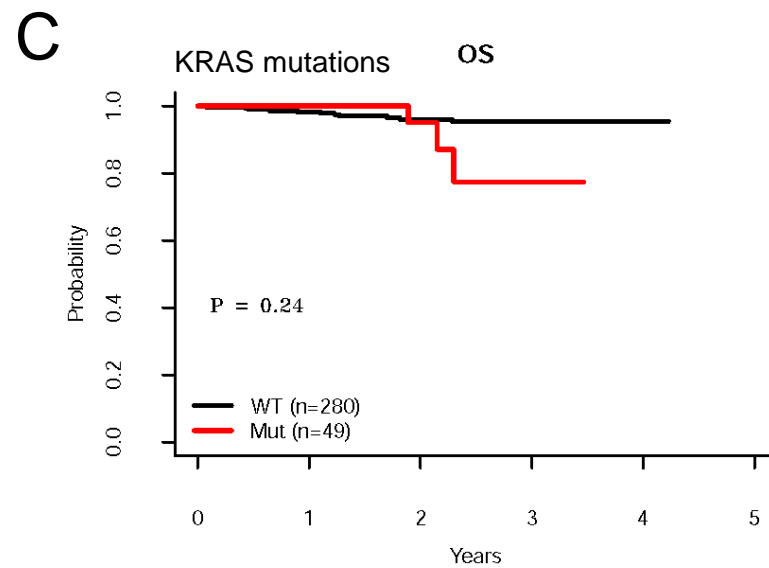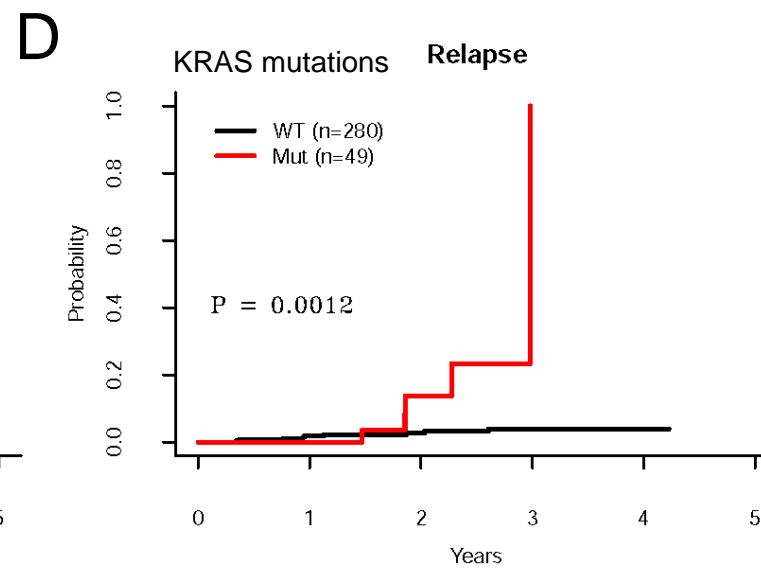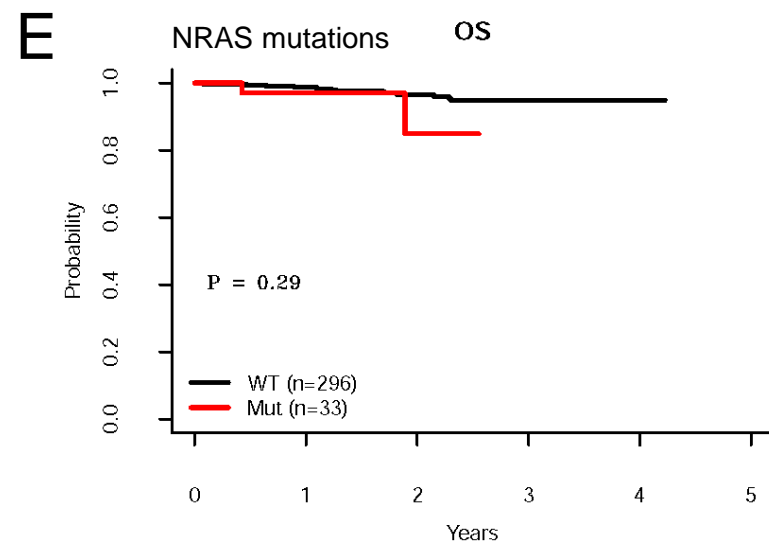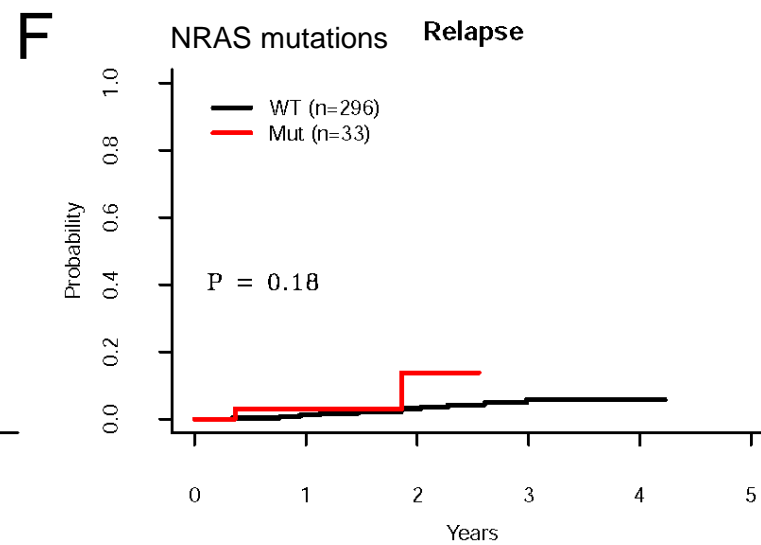

# Supplementary Figure 5

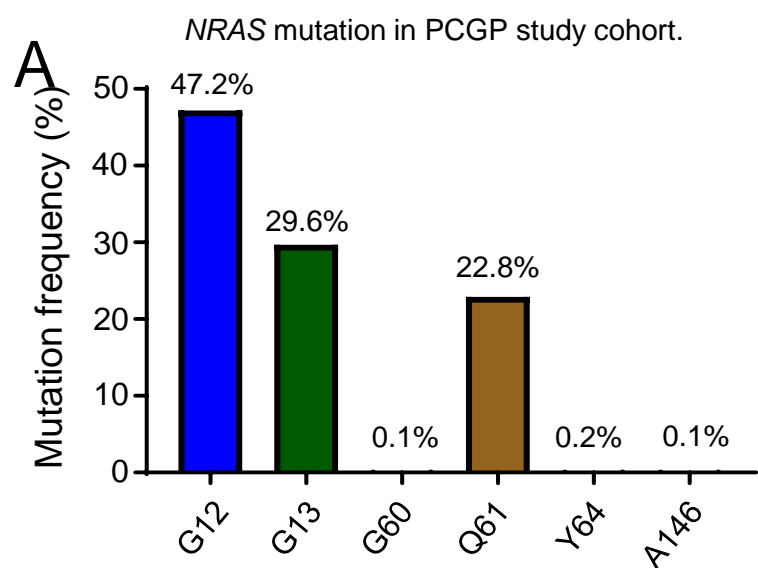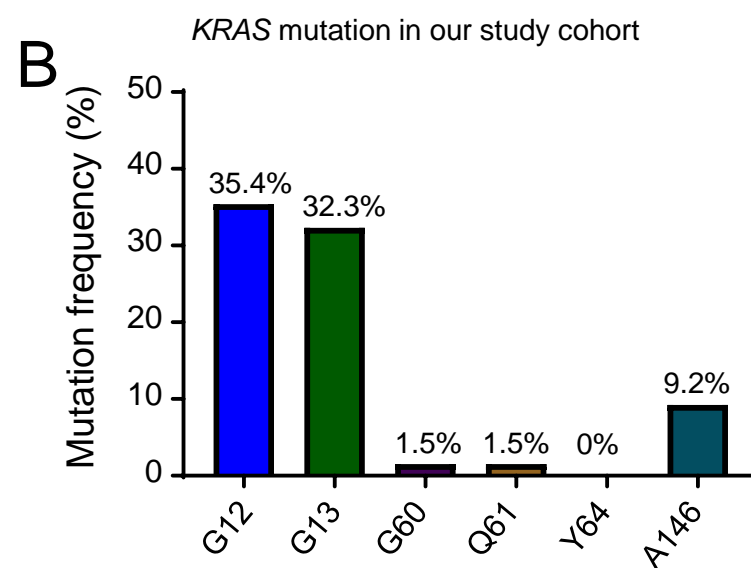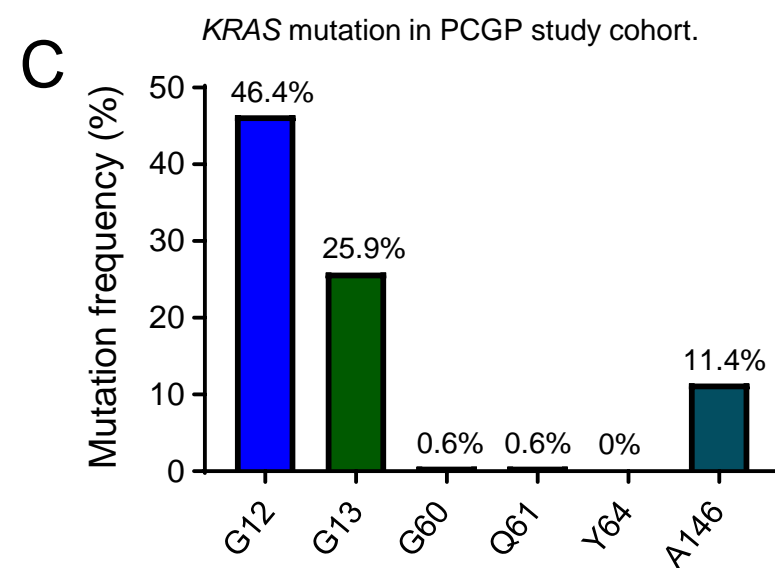

# Supplementary Figure 6

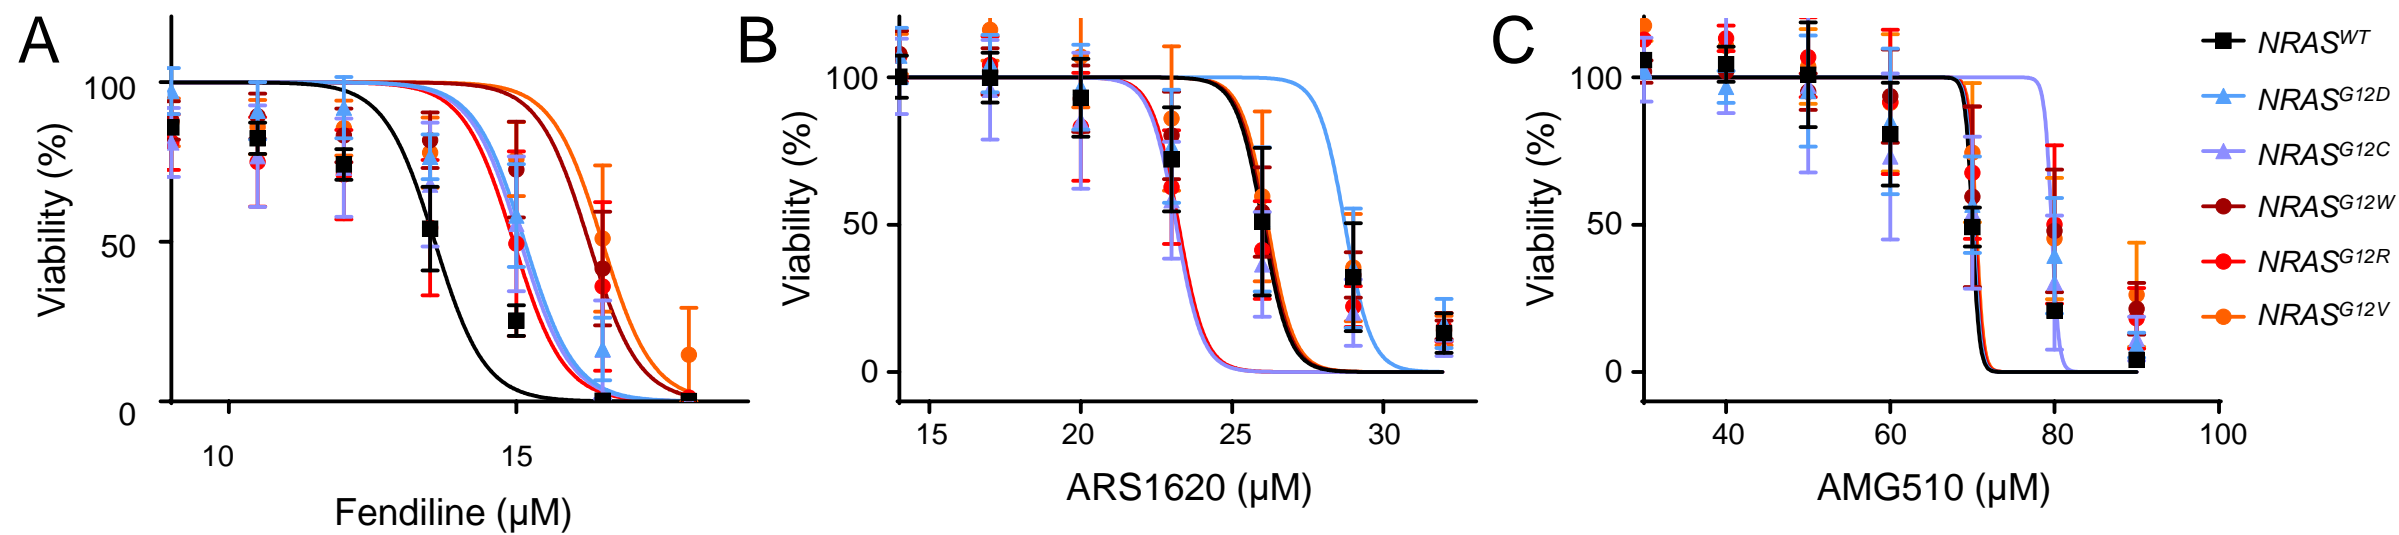

Supplement: DataSheet1.pdf [file DataSheet1.pdf]
